# Supplementary material for: Hemojuvelin is essential for dietary iron sensing, and its mutation leads to severe iron overload
Source: JCI journal article supplement (doi:10.1172/jci25683), 2005-08-01
Supplement: sd1 [file 1]

301 Moved Permanently

# Moved Permanently

The document has moved here.
